# Supplementary material
Source: PubMed Central journal article supplement (PMC3282487)
Supplement: NIHMS325602-supplement-2.pdf [file NIHMS325602-supplement-2.pdf]

Supplementary Table 1: Sequence for primers used in the study

| Name           | Forward (5' seq 3')             | Reverse (5' seq 3')             |
|----------------|---------------------------------|---------------------------------|
| hPGC1 $\alpha$ | aac agc agc aga gac aaa tgc acc | tgc agt tcc aga gag ttc cac act |
| hCox 4i        | cgg tgc cat gtt ctt cat cgg ttt | tca tgt cca gca tcc tct tgg tct |
| hCOX5B         | gga aga ccc taa ttt agt ccc ct  | cca gct tgt aat ggg ctc cac     |
| hATPSYNF1      | cta tgc ggc gca aac atc tc      | ggt ggt agt ccc tca tca aac t   |
| hCYT-C         | aag att gtg cca ctg cac tca agc | agg tga gca caa cag gaa ctg gaa |
| hFASN          | agg ttt gat gcc tcc ttc ttc gga | tgg ctt cat agg tga ctt cca gca |
| hACC           | tcg ctt tgg ggg aaa taa agt g   | gtg tga cca tga caa cga ata ta  |
| hACLY          | aag atc tcg tgg cca atg gag tca | agg ttt gcg gat caa acc aag ctc |
| hSLC25A1       | ttc ccc acc gag tac gtg aa      | gta gag cag gga gct aag gc      |
| hPDHEA1        | atg cag act gta cgc cga atg     | ggg tga aag taa agc cgt gag     |
| hCS            | ggtggcatgagagggcatgaa           | tagccttgggtagcagtttct           |
| hPDK1          | tcc tgg act tcg gat cag tga     | cgg atg gtg tcc tga gaa gat t   |
| hERR $\alpha$  | aat gca ctg gtg tct cat ctg ctg | tga tgg tga cca caa tct ctc ggt |
| hPGC1 $\beta$  | aac ttc tgg ctc aag acg tgc tct | tct tgg gtg aag ctg cga tcc tta |
| hSREBP1c       | gga ggg gta ggg cca acg gcc     | cat ctc ttc gaa agt gca atc c   |
| hActin         | ggc tgt att ccc ctc cat cg      | cca gtt ggt aac aat gcc atg     |
| mPgc1 $\alpha$ | ccc tgc cat tgt aaa gac         | tgc tgc tgt tcc tgt ttt         |
| mCox 4i        | acc aag cga atg ctg aac at      | ggc gga gaa gcc ctg aa          |
| mCox5b         | gct gca tet gtg aag agg aca ac  | cag ctt gta atg ggt tcc aca gt  |
| mAtpsynF1      | tct cca tgc ctc taa cac tcg     | cca ggg tca aca gac gtg tca g   |
| mCyt-C         | cca aat ctc cac ggt ctg ttc     | atc agg gta tcc tct ccc cag     |
| mAcly          | aag cct ttg aca gcg gca tca ttc | ttg agg atc tgc act cgc atg tct |
| mAcc:          | gtc ccc agg gat gaa cca ata     | gcc atg ctc aac caa agt agc     |
| mFas           | gga ggt ggt gat agc cgg tat     | tgg gta atc cat aga gcc cag     |
| mPdhea1        | gctggcataaacctacggac            | cct ttc cct tta gca caa cct c   |
| mPdk1          | ctg gtg caa agt tgg tat atc ca  | gtg ctg gtt gag tag cat tct aa  |
| mCs            | ggacaattttccaaccaatctgc         | tcggttcattccctctgcata           |
| mErr $\alpha$  | cct ccc gcc ttc tac agg t       | cac acg gca cag tag cga g       |
| m Pgc1 $\beta$ | gct ctg gta ggg gca gtg a       | tcc tgt aaa agc ccg gag tat     |
| mActin         | gag acc ttc aac acc cc          | gtg gtg gtg aag ctg tag cc      |

h=human; m= mouse
